|                 | <b>OE</b>      |          | <b>MC-NJ + MC-J</b> |          |
|-----------------|----------------|----------|---------------------|----------|
|                 | Cohen $\kappa$ | <i>n</i> | Cohen $\kappa$      | <i>n</i> |
| <b>Step 1</b>   | <b>0.782</b>   | 119      | <b>0.986</b>        | 238      |
| <b>Step 2CK</b> | <b>0.747</b>   | 109      | <b>0.978</b>        | 218      |
| <b>Step 3</b>   | <b>0.813</b>   | 122      | <b>0.947</b>        | 244      |

**Supporting Information 4**
