# Supplementary material for: Performance of ChatGPT on USMLE: Potential for AI-assisted medical education using large language models
Source: PLOS journal article supplement (doi:10.1371/journal.pdig.0000198), 2023-02-09
Supplement: S3 (10.1371/journal.pdig.0000198.s003) [file journal.pdig.0000198.s003]

**A**

| Encoder (Individual) | Accuracy (%) |       |       |
|----------------------|--------------|-------|-------|
|                      | OE           | MC-NJ | MC-J  |
| A                    | 54.84        | 59.09 | 60.71 |
| B                    | 52.73        | 55.36 | 54.55 |
| C                    | 55.88        | 56.72 | 52.86 |
| D                    | 54.29        | 54.29 | 57.14 |
| E                    | 62.5         | 59.38 | 76.67 |
| F                    | 48.57        | 69.7  | 67.74 |
| G                    | 61.11        | 61.11 | 57.14 |
| H                    | 63.41        | 52.5  | 48.65 |

| Source of Variation  | % Total variation | p      |
|----------------------|-------------------|--------|
| Encoder (Individual) | 38.39             | 0.3128 |
| Prompt Type          | 3.232             | 0.6858 |

Ordinary 2-way ANOVA with  $\alpha = 0.05$

**QQ plot**

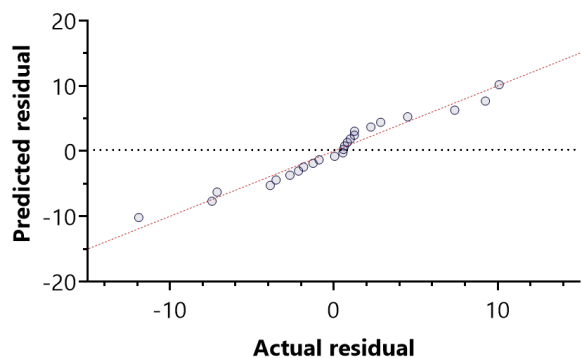

**B**

| Encoder (Expertise) | Accuracy (%) |       |       |
|---------------------|--------------|-------|-------|
|                     | OE           | MC-NJ | MC-J  |
| Physician           | 54.84        | 59.09 | 60.71 |
| Medical Student     | 52.23        | 63.21 | 60.30 |
| Nurse               | 57.70        | 57.70 | 57.14 |
| Generalist          | 59.55        | 55.75 | 59.96 |

| Source of Variation | % Total variation | p      |
|---------------------|-------------------|--------|
| Encoder (Expertise) | 2.071             | 0.9793 |
| Prompt Type         | 28.31             | 0.3593 |

Ordinary 2-way ANOVA with  $\alpha = 0.05$

**QQ plot**

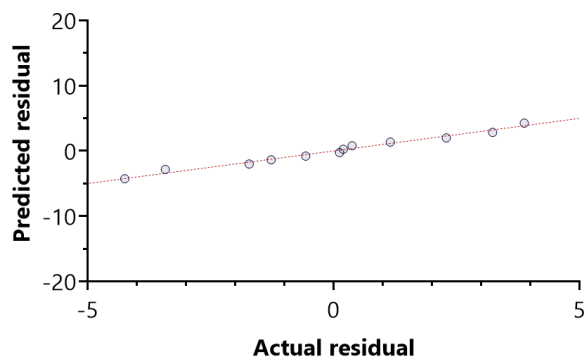

### Supporting Information 3
